# Supplementary material for: Upregulation of HSF1 in estrogen receptor positive breast cancer
Source: PubMed Central journal article supplement (PMC5356658; doi:10.18632/oncotarget.12438), 2016-10-04
Supplement: oncotarget-07-84239-s001.pdf [file oncotarget-07-84239-s001.pdf]

## Upregulation of *HSF1* in estrogen receptor positive breast cancer

### Supplementary Materials

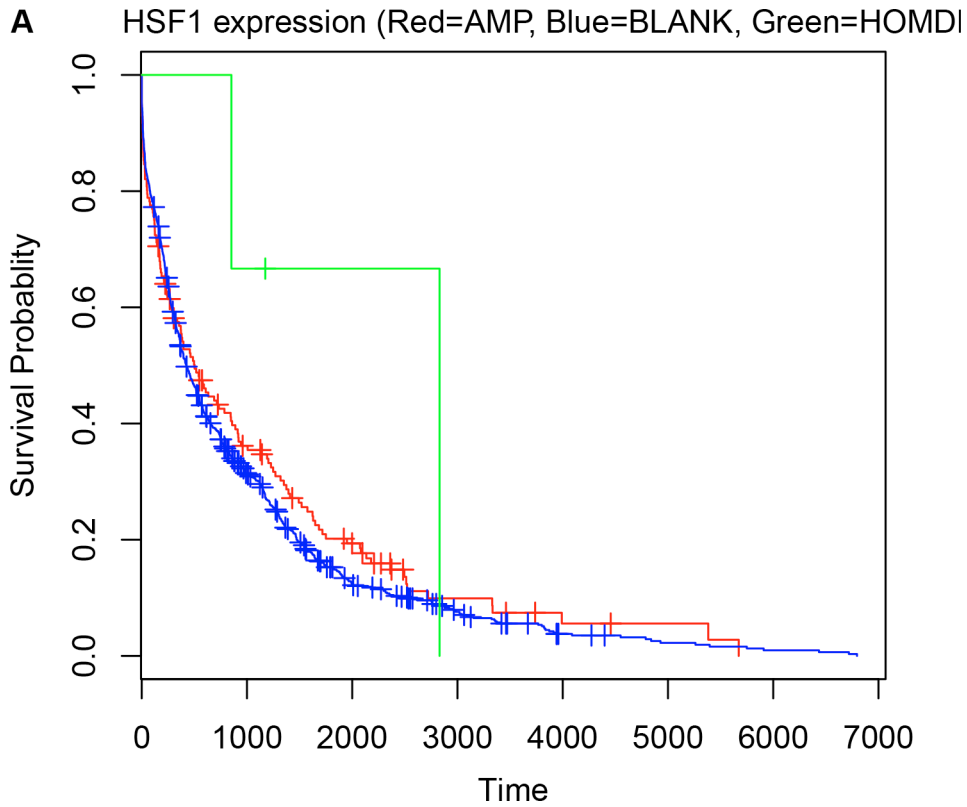

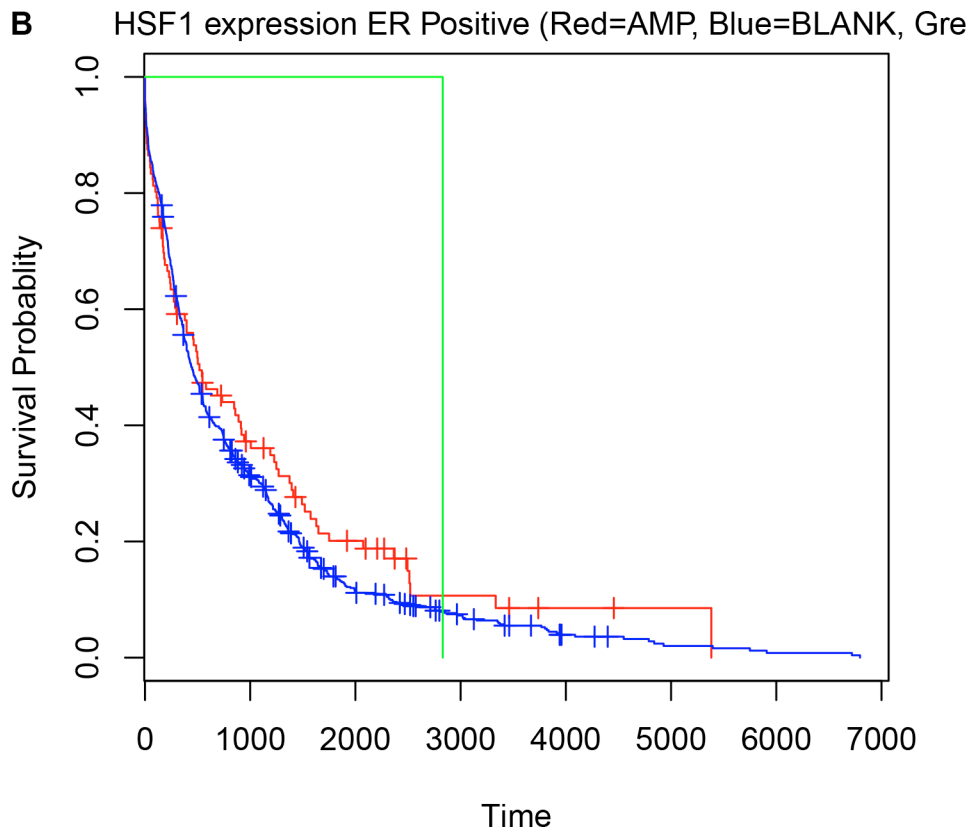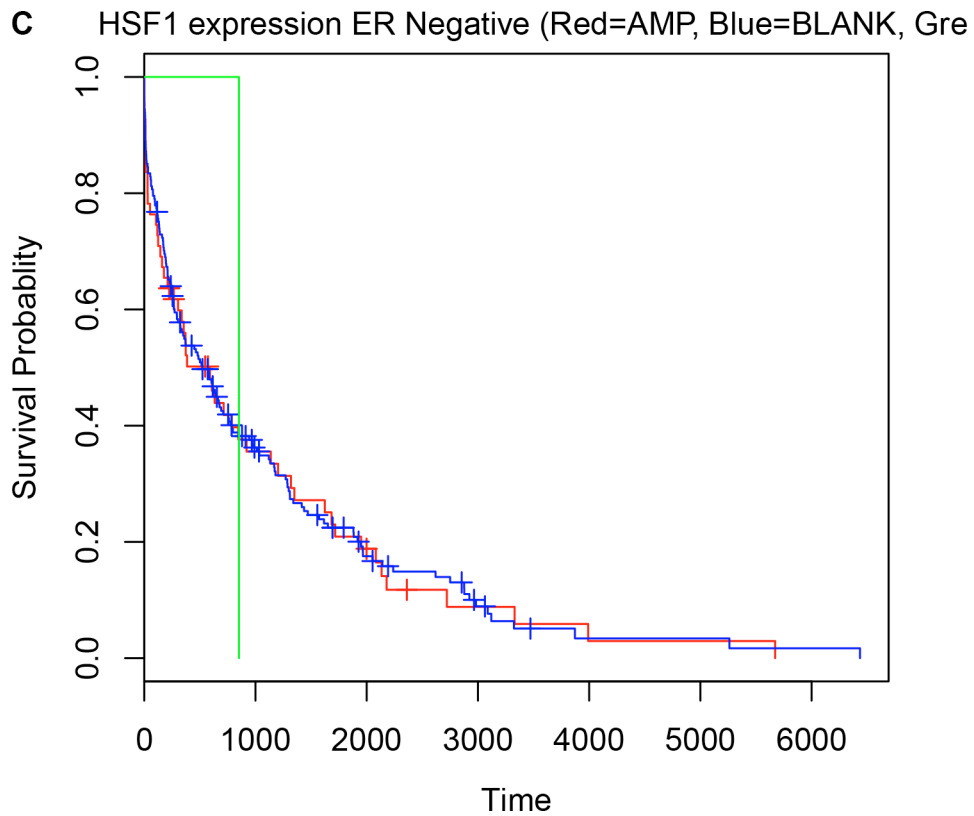

**Supplementary Figure S1: Breast cancer overall survival data analyzing the impact of HSF1 amplification in TCGA Breast Cancer dataset.**

**Supplementary Table S1: Patient age and tumor characteristics of the Oncotype Dx cohort. See Supplementary\_Table\_S1**
